# Supplementary material for: Raney Ni catalyzed azide-alkyne cycloaddition reaction
Source: Royal Society of Chemistry journal article supplement (doi:10.1039/c4ra07057g), 2014-01-01
Supplement: c4ra07057g1.pdf [file c4ra07057g1.pdf]

## Supplementary Information

### Raney Ni Catalyzed Azide-Alkyne Cycloaddition Reaction

H. Surya Prakash Rao\* and Guravaiah Chakibanda

Department of Chemistry, Pondicherry University, Puducherry – 605 014, India.

E-mail: [hspr.che@pondiuni.edu.in](mailto:hspr.che@pondiuni.edu.in)

#### Index

|                                                                                                                                                                                                                                                                                                             |    |
|-------------------------------------------------------------------------------------------------------------------------------------------------------------------------------------------------------------------------------------------------------------------------------------------------------------|----|
| <sup>1</sup> H (400 MHz, CCl <sub>4</sub> :CDCl <sub>3</sub> , 1:1) and <sup>13</sup> C (100 MHz, CCl <sub>4</sub> :CDCl <sub>3</sub> , 1:1) NMR spectra of 4-(hexyloxymethyl)-1-phenyl-1 <i>H</i> -1,2,3-triazole <b>3e</b> .                                                                              | S3 |
| <sup>1</sup> H (400 MHz, CCl <sub>4</sub> :CDCl <sub>3</sub> , 1:1) and <sup>13</sup> C (100 MHz, CCl <sub>4</sub> :CDCl <sub>3</sub> , 1:1) NMR spectra of 4-((but-1-ynyloxy)methyl)-1-phenyl-1 <i>H</i> -1,2,3-triazole <b>3f</b> .                                                                       | S4 |
| <sup>1</sup> H (400 MHz, CCl <sub>4</sub> :CDCl <sub>3</sub> , 1:1) and <sup>13</sup> C (100 MHz, CCl <sub>4</sub> :CDCl <sub>3</sub> , 1:1) NMR spectra of 4-(benzyloxymethyl)-1-phenyl-1 <i>H</i> -1,2,3-triazole <b>3g</b> .                                                                             | S5 |
| <sup>1</sup> H (400 MHz, CCl <sub>4</sub> :CDCl <sub>3</sub> , 1:1) and <sup>13</sup> C (100 MHz, CCl <sub>4</sub> :CDCl <sub>3</sub> , 1:1) NMR spectra of 4-(cyclohexyloxymethyl)-1-phenyl-1 <i>H</i> -1,2,3-triazole <b>3h</b> .                                                                         | S6 |
| <sup>1</sup> H (400 MHz, CCl <sub>4</sub> :CDCl <sub>3</sub> , 1:1) and <sup>13</sup> C (100 MHz, CCl <sub>4</sub> :CDCl <sub>3</sub> , 1:1) NMR spectra of 4-((4- <i>tert</i> -butylphenoxy) methyl)-1-hexyl-1 <i>H</i> -1,2,3-triazole <b>3n</b> .                                                        | S7 |
| <sup>1</sup> H (400 MHz, CCl <sub>4</sub> :CDCl <sub>3</sub> , 1:1) and <sup>13</sup> C (100 MHz, CCl <sub>4</sub> :CDCl <sub>3</sub> , 1:1) NMR spectra of 1-benzyl-4-(benzyloxymethyl)-1 <i>H</i> -1,2,3-triazole, 5-(benzyloxymethyl)-1-bromo-1 <i>H</i> -1,2,3-triazole (1:1) <b>3o</b> and <b>3s</b> . | S8 |
| <sup>1</sup> H (400 MHz, CCl <sub>4</sub> :CDCl <sub>3</sub> , 1:1) and <sup>13</sup> C (100 MHz, CCl <sub>4</sub> :CDCl <sub>3</sub> , 1:1) NMR spectra of 4-(benzyloxymethyl)-1-hexyl-1 <i>H</i> -1,2,3-triazole, 5-(benzyloxymethyl)-1-hexyl-1 <i>H</i> -1,2,3-triazole <b>3p</b> , <b>3t</b> .          | S9 |
| <sup>1</sup> H (400 MHz, CCl <sub>4</sub> :CDCl <sub>3</sub> , 1:1) and <sup>13</sup> C (100 MHz, CCl <sub>4</sub> :CDCl <sub>3</sub> , 1:1) NMR spectra of                                                                                                                                                 |    |

|                                                                                                                                                                                                                                                                                                                                             |     |
|---------------------------------------------------------------------------------------------------------------------------------------------------------------------------------------------------------------------------------------------------------------------------------------------------------------------------------------------|-----|
| 1-benzyl-4-(cyclohexyloxymethyl)-1 <i>H</i> -1,2,3-triazole, 1-benzyl-5-(cyclohexyloxymethyl)-1 <i>H</i> -1,2,3-triazole <b>3q</b> , <b>3u</b> .                                                                                                                                                                                            | S10 |
| <sup>1</sup> H (400 MHz, CCl <sub>4</sub> :CDCl <sub>3</sub> , 1:1) and <sup>13</sup> C (100 MHz, CCl <sub>4</sub> :CDCl <sub>3</sub> , 1:1) NMR spectra of 4-(cyclohexyloxymethyl)-1-hexyl-1 <i>H</i> -1,2,3-triazole, 5-(cyclohexyloxymethyl)-1-hexyl-1 <i>H</i> -1,2,3-triazole <b>3r</b> and <b>3v</b> .                                | S11 |
| <sup>1</sup> H (400 MHz, CCl <sub>4</sub> :CDCl <sub>3</sub> , 1:1) and <sup>13</sup> C (100 MHz, CCl <sub>4</sub> :CDCl <sub>3</sub> , 1:1) NMR spectra of 4-(benzyloxymethyl)-1-hexyl-1 <i>H</i> -1,2,3-triazole <b>3t</b> .                                                                                                              | S12 |
| <sup>1</sup> H (400 MHz, CCl <sub>4</sub> :CDCl <sub>3</sub> , 1:1) and <sup>13</sup> C (100 MHz, CCl <sub>4</sub> :CDCl <sub>3</sub> , 1:1) NMR spectra of 1-benzyl-4-(cyclohexyloxymethyl)-1 <i>H</i> -1,2,3-triazole <b>3u</b> .                                                                                                         | S13 |
| <sup>1</sup> H (400 MHz, CCl <sub>4</sub> :CDCl <sub>3</sub> , 1:1) and <sup>13</sup> C (100 MHz, CCl <sub>4</sub> :CDCl <sub>3</sub> , 1:1) NMR spectra of 4-(cyclohexyloxymethyl)-1-hexyl-1 <i>H</i> -1,2,3-triazole <b>3v</b> .                                                                                                          | S14 |
| <sup>1</sup> H (400 MHz, CCl <sub>4</sub> :CDCl <sub>3</sub> , 1:1) and <sup>13</sup> C (100 MHz, CCl <sub>4</sub> :CDCl <sub>3</sub> , 1:1) NMR spectra of (((3-deuterioprop-2-yn-1-yl)oxy)methyl)benzene <b>4</b> .                                                                                                                       | S15 |
| <sup>1</sup> H (400 MHz, CCl <sub>4</sub> :CDCl <sub>3</sub> , 1:1) spectra of 4-(phenoxyethyl)-1-phenyl-1 <i>D</i> -1,2,3-triazole <b>8</b> .                                                                                                                                                                                              | S16 |
| <sup>1</sup> H (400 MHz, CCl <sub>4</sub> :CDCl <sub>3</sub> , 1:1) and <sup>13</sup> C (100 MHz, CCl <sub>4</sub> :CDCl <sub>3</sub> , 1:1) NMR spectra of 4-(1-(benzyloxy)cyclohexyl)-1-phenyl-1 <i>H</i> -1,2,3-triazole <b>3x</b> .                                                                                                     | S17 |
| <sup>1</sup> H (400 MHz, CCl <sub>4</sub> :CDCl <sub>3</sub> , 1:1) and <sup>13</sup> C (100 MHz, CCl <sub>4</sub> :CDCl <sub>3</sub> , 1:1) NMR spectra of (1-phenyl-1 <i>H</i> -1,2,3-triazol-4-yl)methanol <b>3y</b> and (1-phenyl-1 <i>H</i> -1,2,3-triazol-5-yl)methanol <b>3z</b> .                                                   | S18 |
| <sup>1</sup> H (400 MHz, CDCl <sub>3</sub> ) <sup>13</sup> C (100 MHz, CDCl <sub>3</sub> ) and DEPT-135 (100 MHz, CDCl <sub>3</sub> ) NMR spectra of the crude cycloadduct from reaction of propargyl alcohol, phenyl azide and CuSO <sub>4</sub> ·5H <sub>2</sub> O, sodium ascorbate in PEG-200 under MW irradiation (with PEG impurity). | S19 |
| <sup>1</sup> H (400 MHz, CDCl <sub>3</sub> ), <sup>13</sup> C (100 MHz, CDCl <sub>3</sub> ) and DEPT-135 (100 MHz, CDCl <sub>3</sub> ) NMR spectra of the crude product from the reaction of propargyl alcohol, phenyl azide in PEG-200 under MW irradiation without any catalyst (with PEG impurity).                                      | S20 |

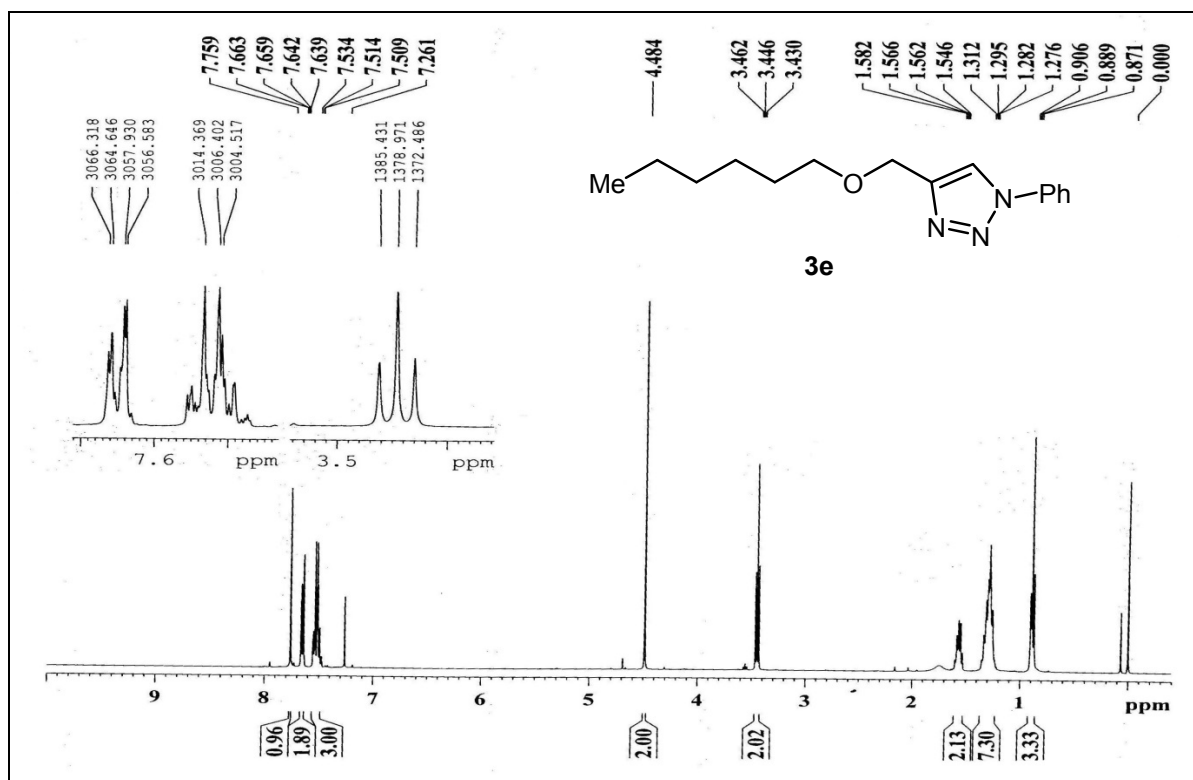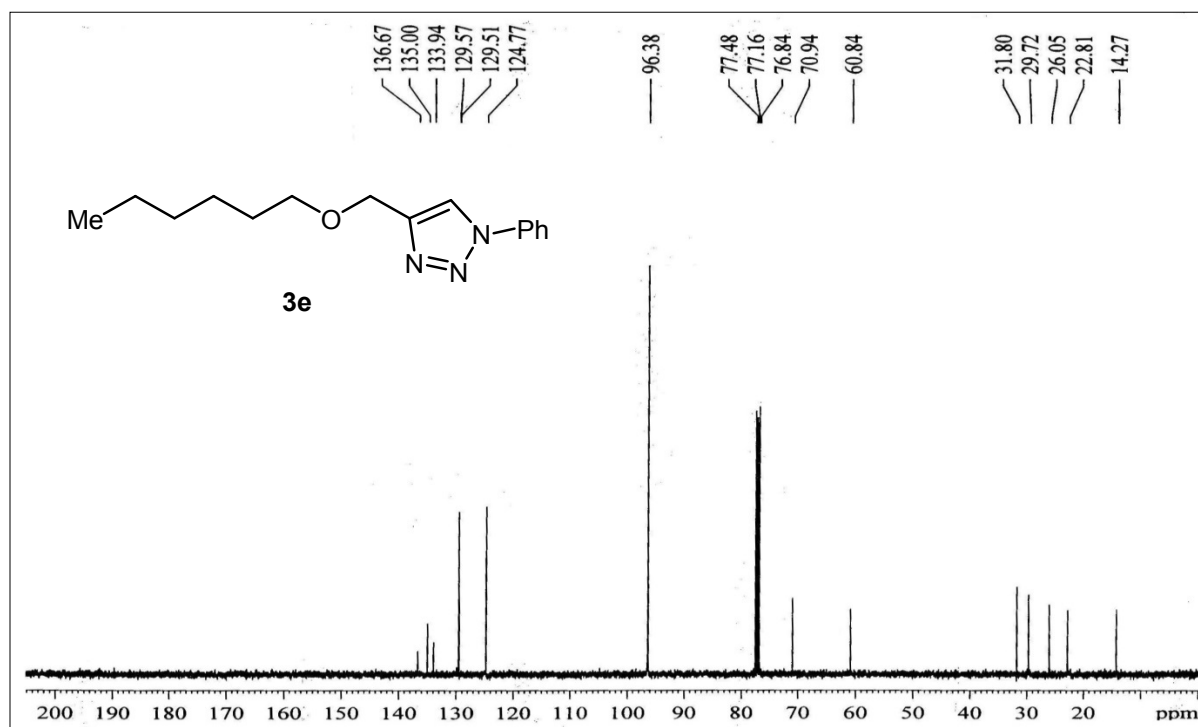

<sup>1</sup>H (400 MHz, CCl<sub>4</sub>:CDCl<sub>3</sub>, 1:1) and <sup>13</sup>C (100 MHz, CCl<sub>4</sub>:CDCl<sub>3</sub>, 1:1) NMR spectra of 4-(hexyloxymethyl)-1-phenyl-1*H*-1,2,3-triazole **3e**.

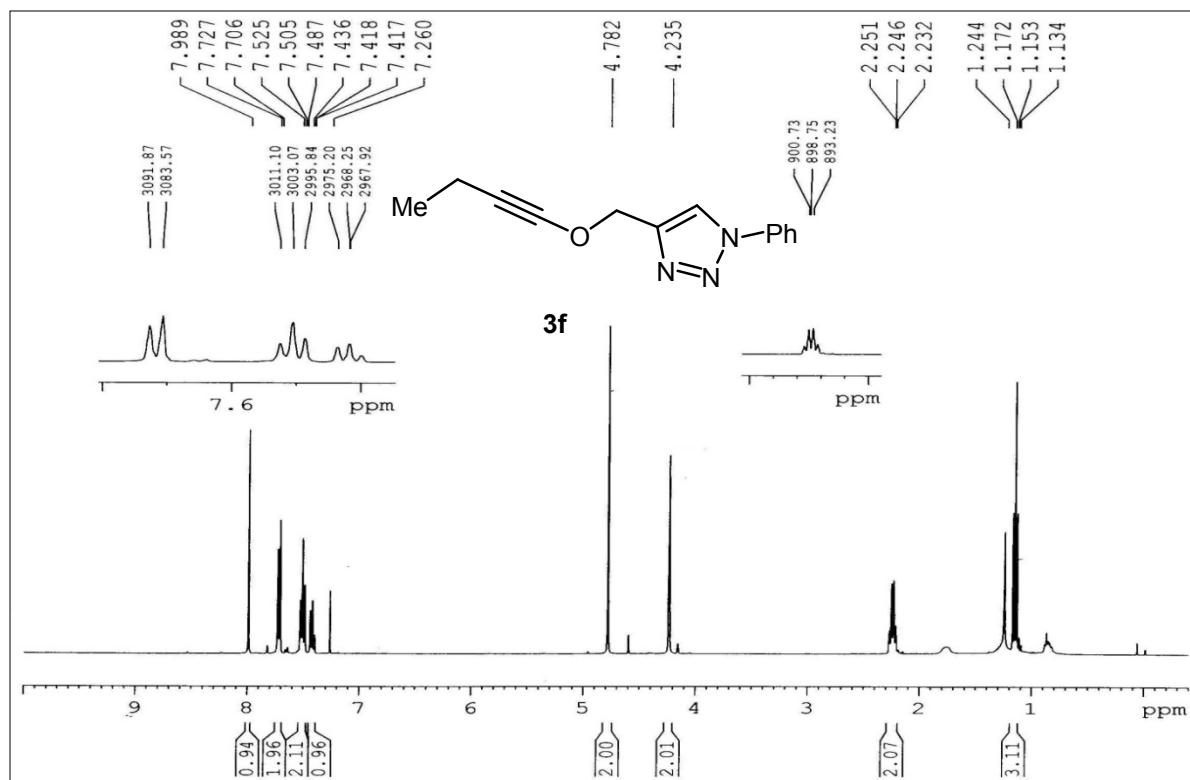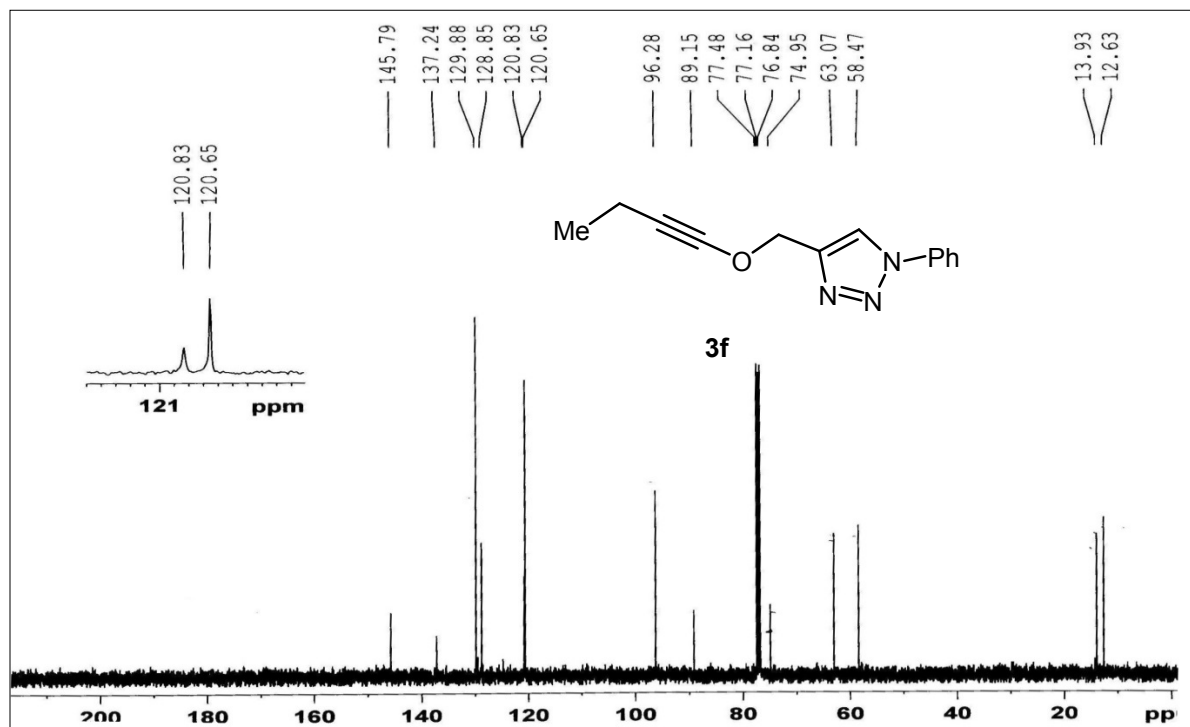

<sup>1</sup>H (400 MHz, CCl<sub>4</sub>:CDCl<sub>3</sub>, 1:1) and <sup>13</sup>C (100 MHz, CCl<sub>4</sub>:CDCl<sub>3</sub>, 1:1) NMR spectra of 4-((but-1-ynyl)methyl)-1-phenyl-1H-1,2,3-triazole **3f**.

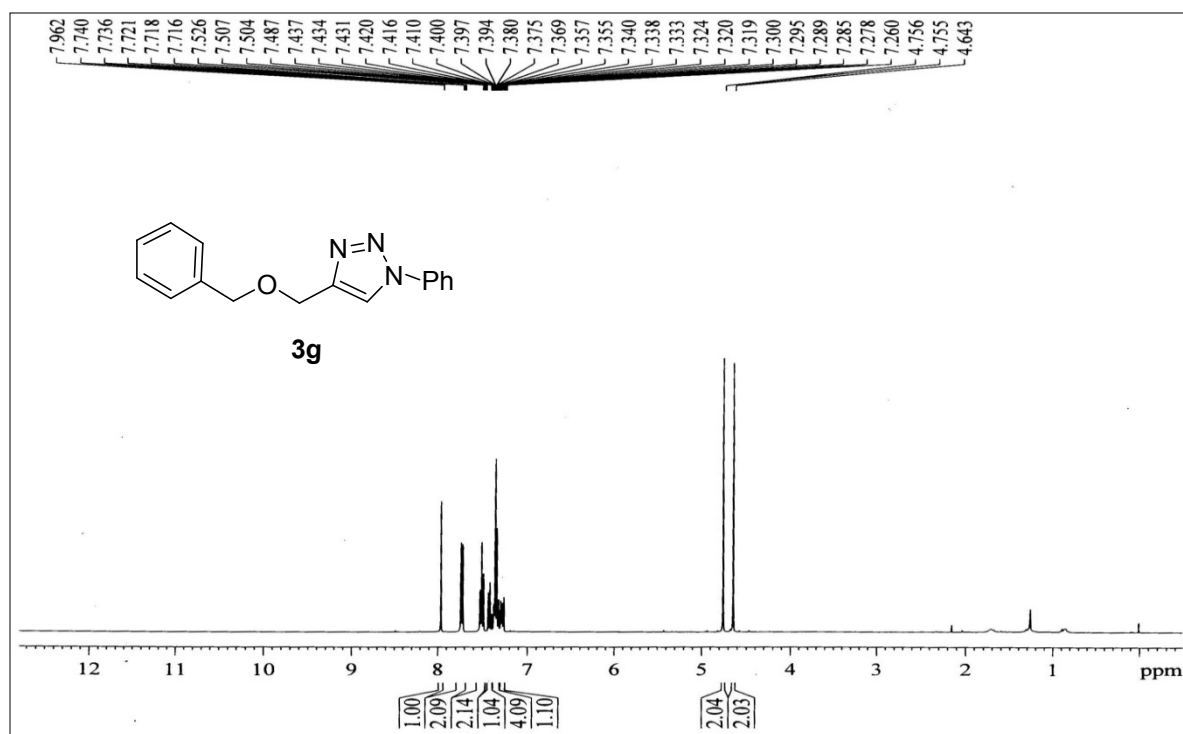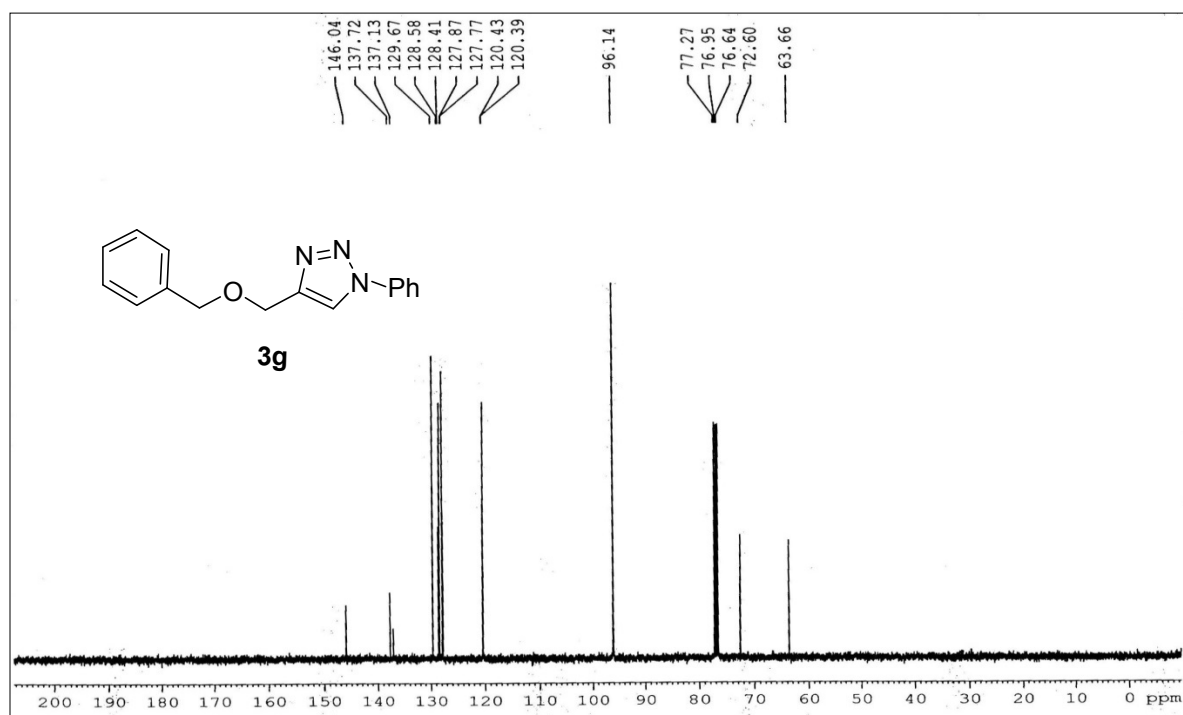

<sup>1</sup>H (400 MHz, CCl<sub>4</sub>:CDCl<sub>3</sub>, 1:1) and <sup>13</sup>C (100 MHz, CCl<sub>4</sub>:CDCl<sub>3</sub>, 1:1) NMR spectra of 4-(benzyloxymethyl)-1-phenyl-1H-1,2,3-triazole **3g**.

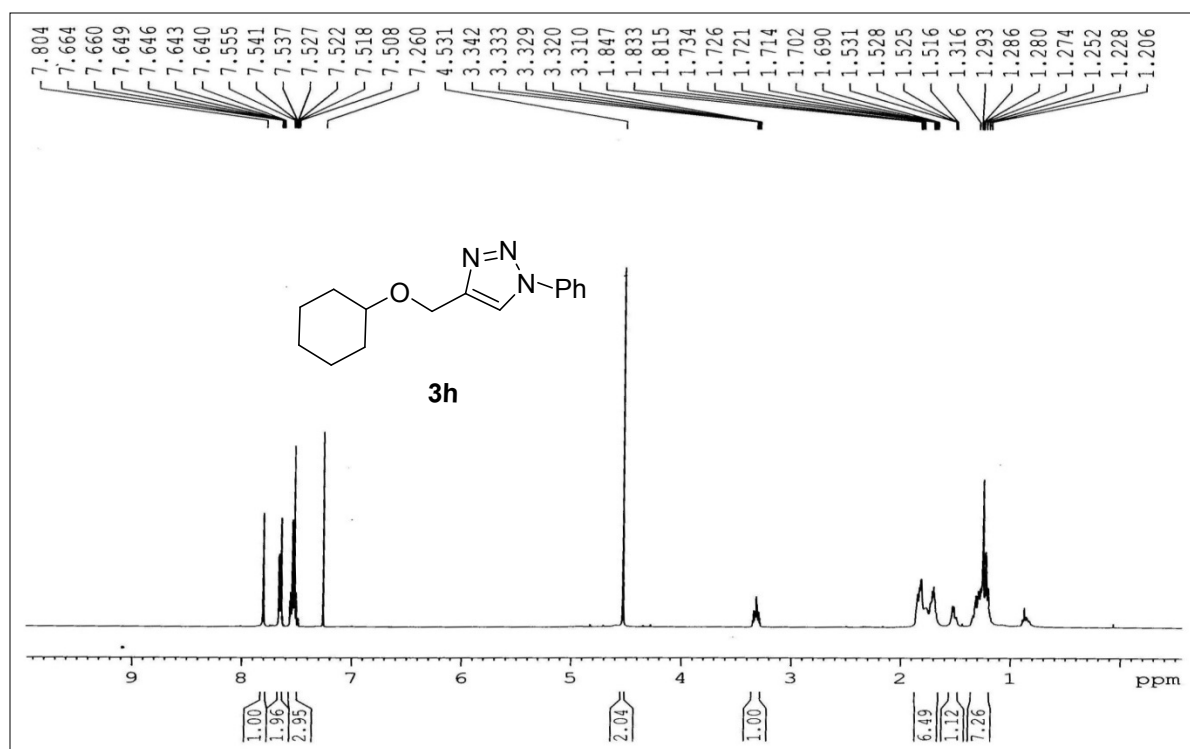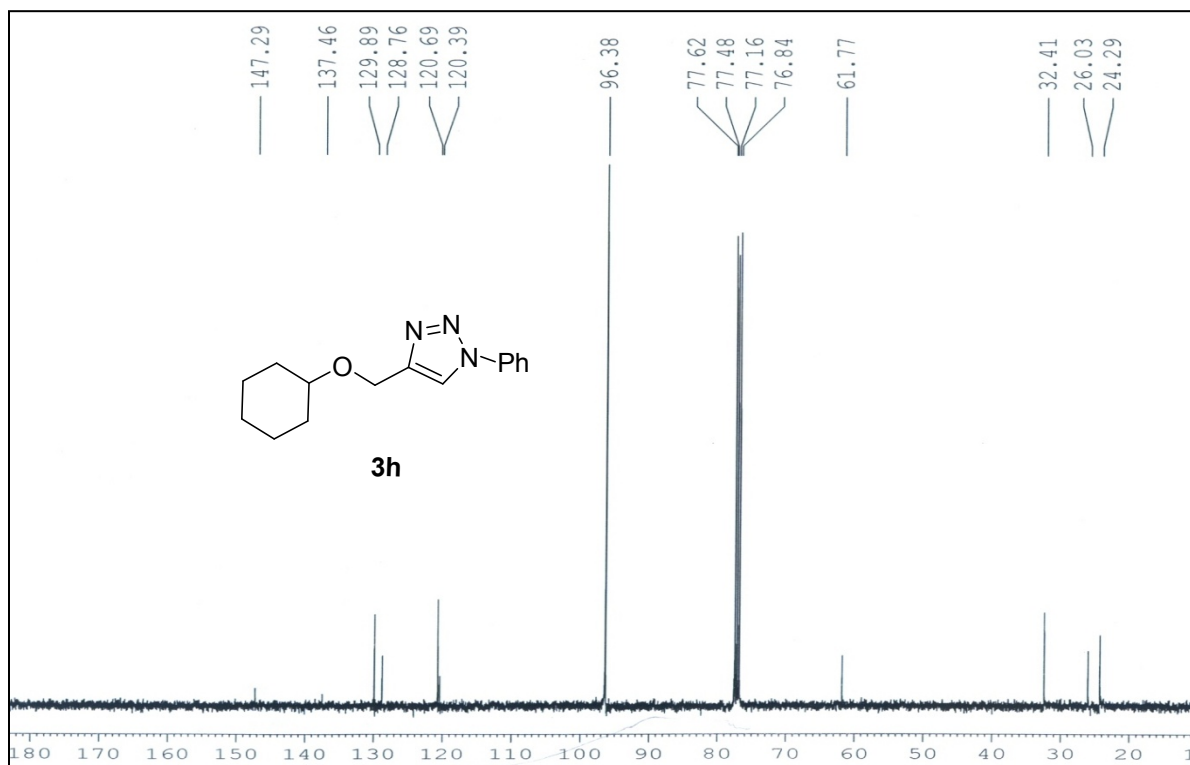

<sup>1</sup>H (400 MHz, CCl<sub>4</sub>:CDCl<sub>3</sub>, 1:1) and <sup>13</sup>C (100 MHz, CCl<sub>4</sub>:CDCl<sub>3</sub>, 1:1) NMR spectra of 4-(cyclohexyloxymethyl)-1-phenyl-1*H*-1,2,3-triazole **3h**.

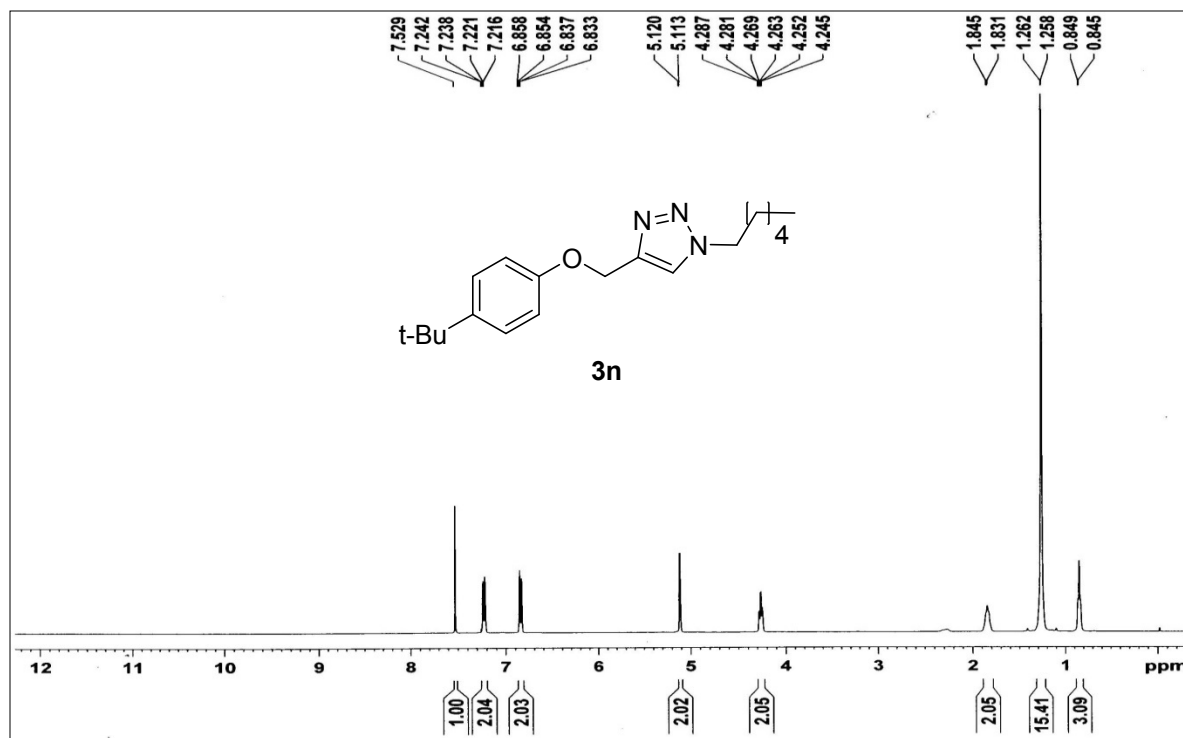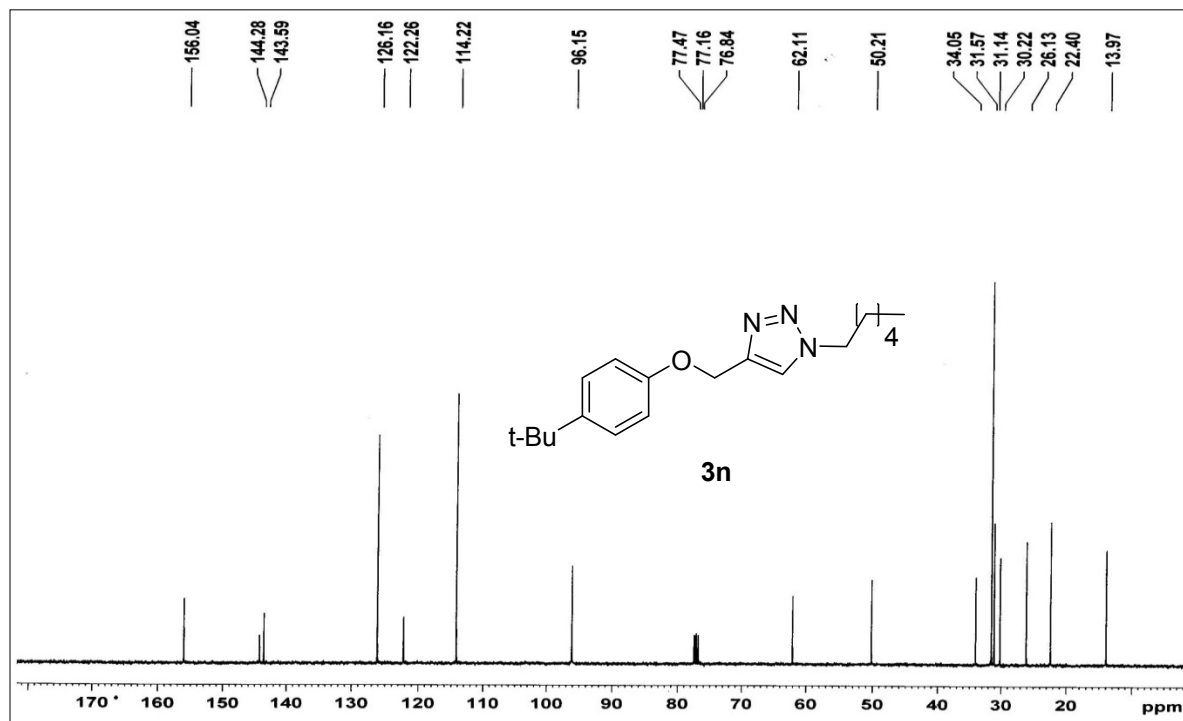

<sup>1</sup>H (400 MHz, CCl<sub>4</sub>:CDCl<sub>3</sub>, 1:1) and <sup>13</sup>C (100 MHz, CCl<sub>4</sub>:CDCl<sub>3</sub>, 1:1) NMR spectra of 4-((4-*tert*-butylphenoxy) methyl)-1-hexyl-1*H*-1,2,3-triazole **3n**.

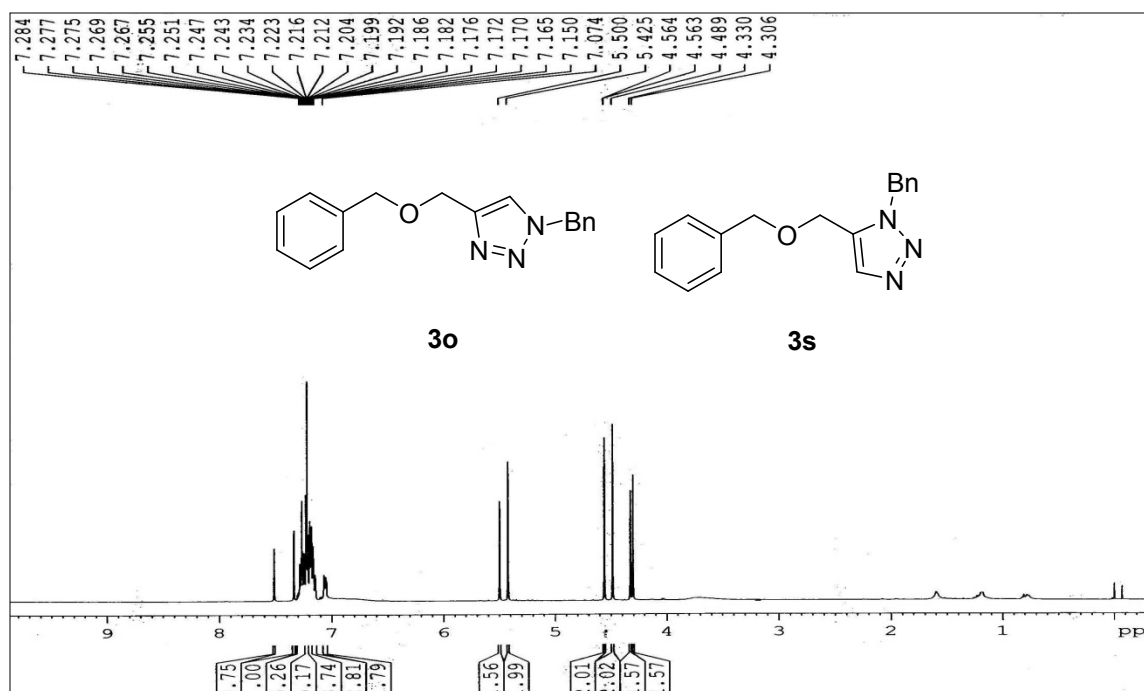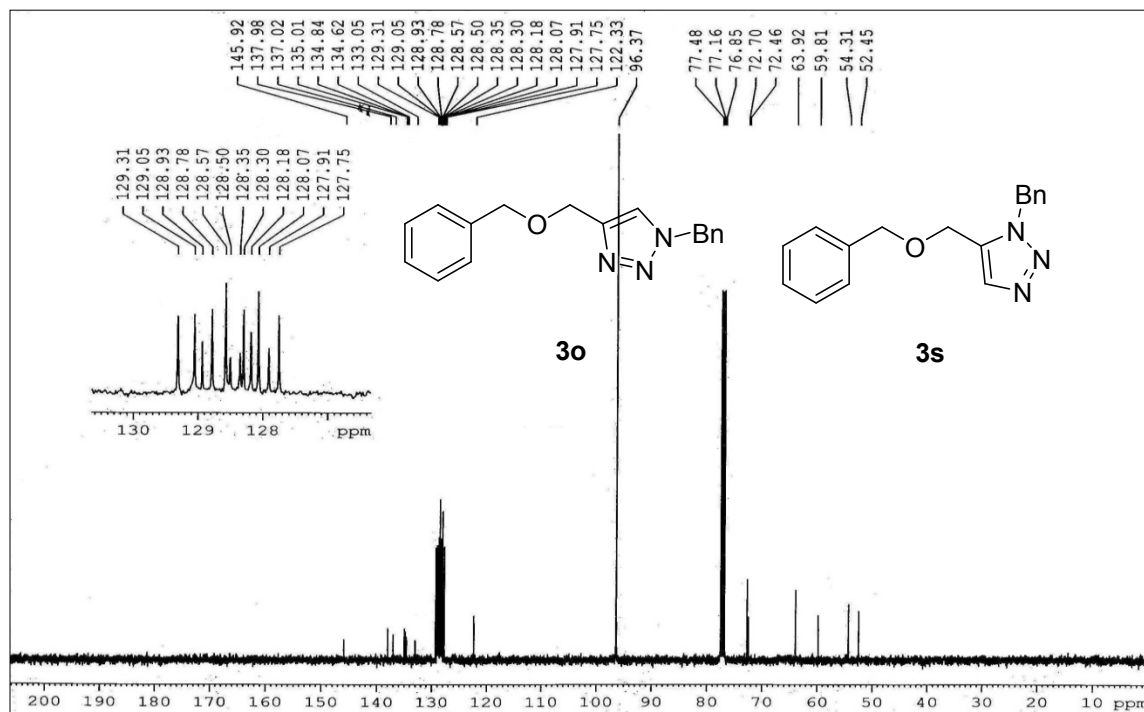

<sup>1</sup>H (400 MHz, CCl<sub>4</sub>:CDCl<sub>3</sub>, 1:1) and <sup>13</sup>C (100 MHz, CCl<sub>4</sub>:CDCl<sub>3</sub>, 1:1) NMR spectra of 1-benzyl-4-(benzyloxymethyl)-1H-1,2,3-triazole, 5-(benzyloxymethyl)-1-bromo-1H-1,2,3-triazole **3o**, **3s**.



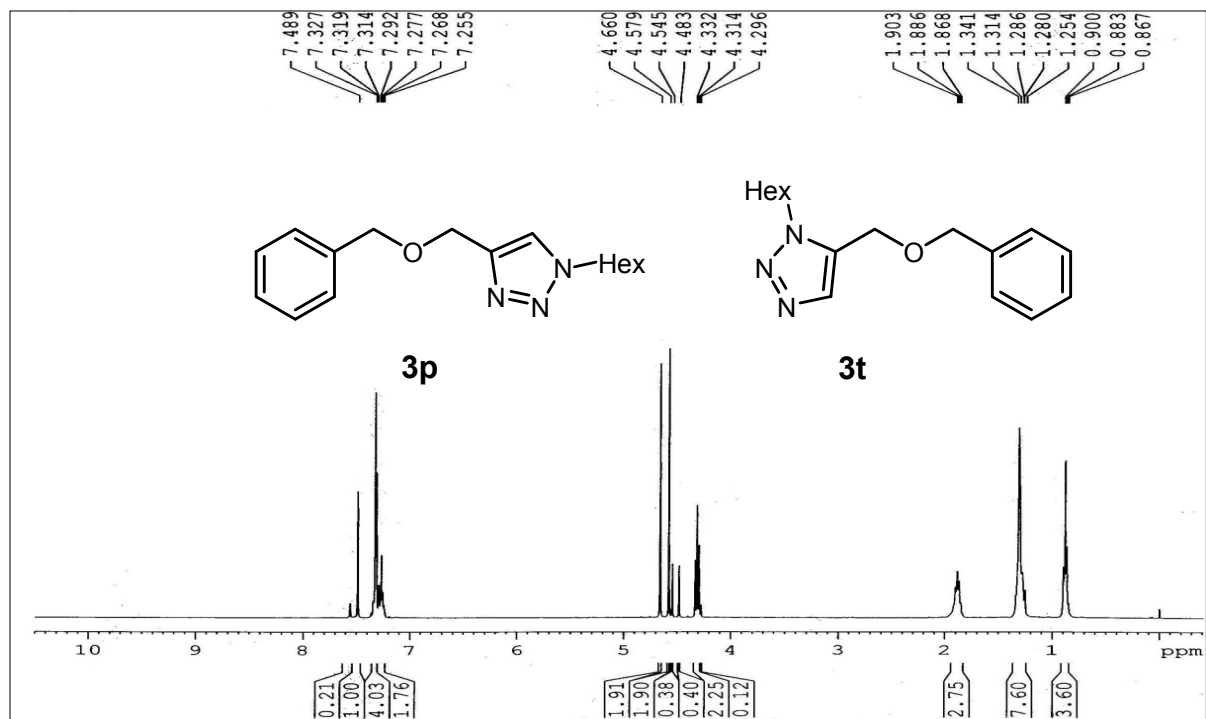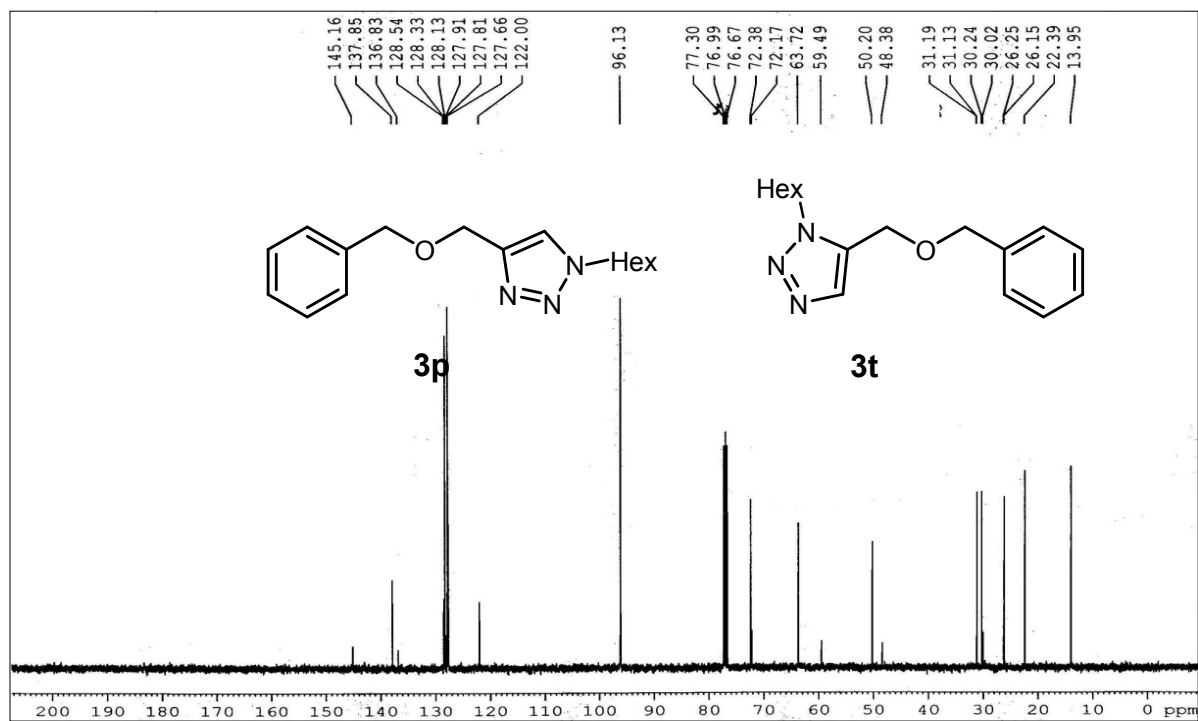

<sup>1</sup>H (400 MHz, CCl<sub>4</sub>:CDCl<sub>3</sub>, 1:1) and <sup>13</sup>C (100 MHz, CCl<sub>4</sub>:CDCl<sub>3</sub>, 1:1) NMR spectra of 4-(benzyloxymethyl)-1-hexyl-1*H*-1,2,3-triazole, 5-(benzyloxymethyl)-1-hexyl-1*H*-1,2,3-triazole **3p**, **3t**.

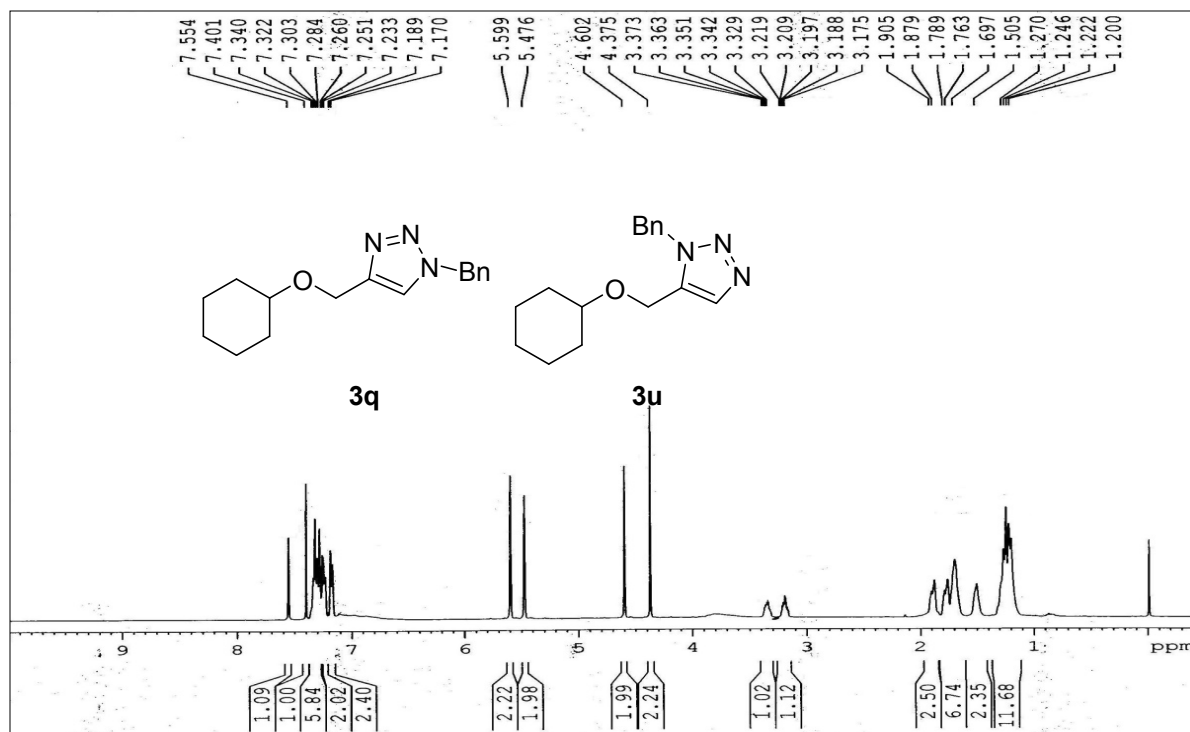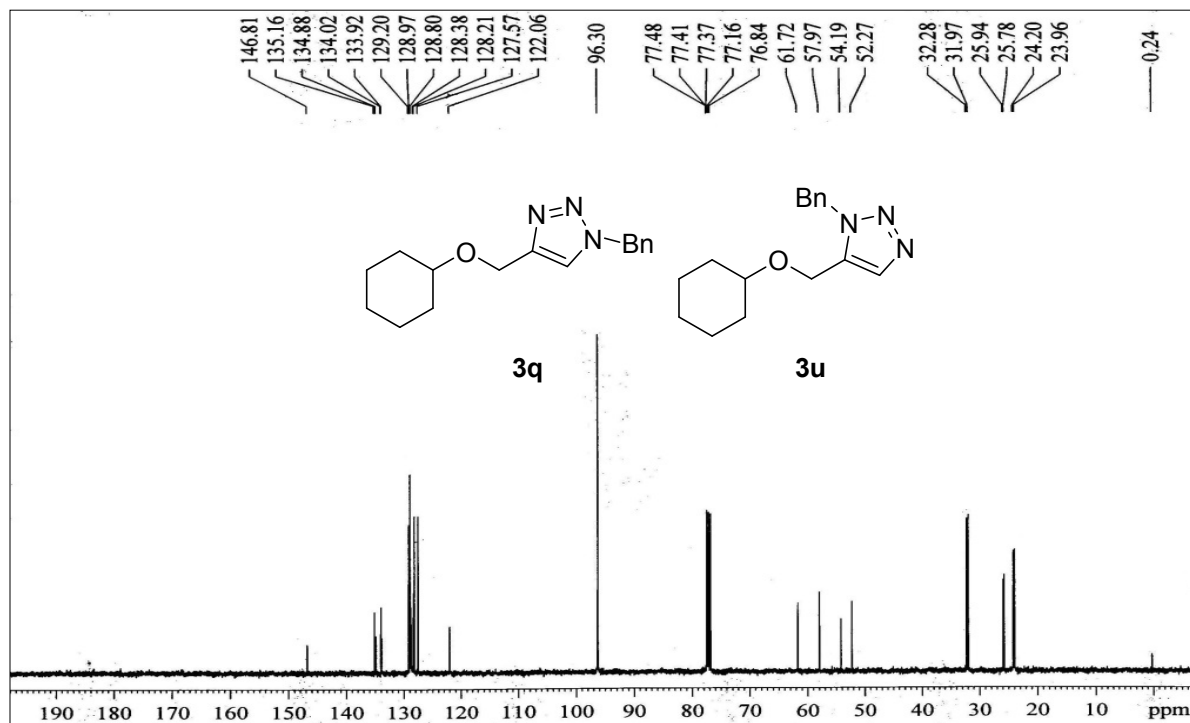

<sup>1</sup>H (400 MHz, CCl<sub>4</sub>:CDCl<sub>3</sub>, 1:1) and <sup>13</sup>C (100 MHz, CCl<sub>4</sub>:CDCl<sub>3</sub>, 1:1) NMR spectra of 1-benzyl-4-(cyclohexyloxymethyl)-1H-1,2,3-triazole, 1-benzyl-5-(cyclohexyloxymethyl)-1H-1,2,3-triazole **3q**, **3t**.

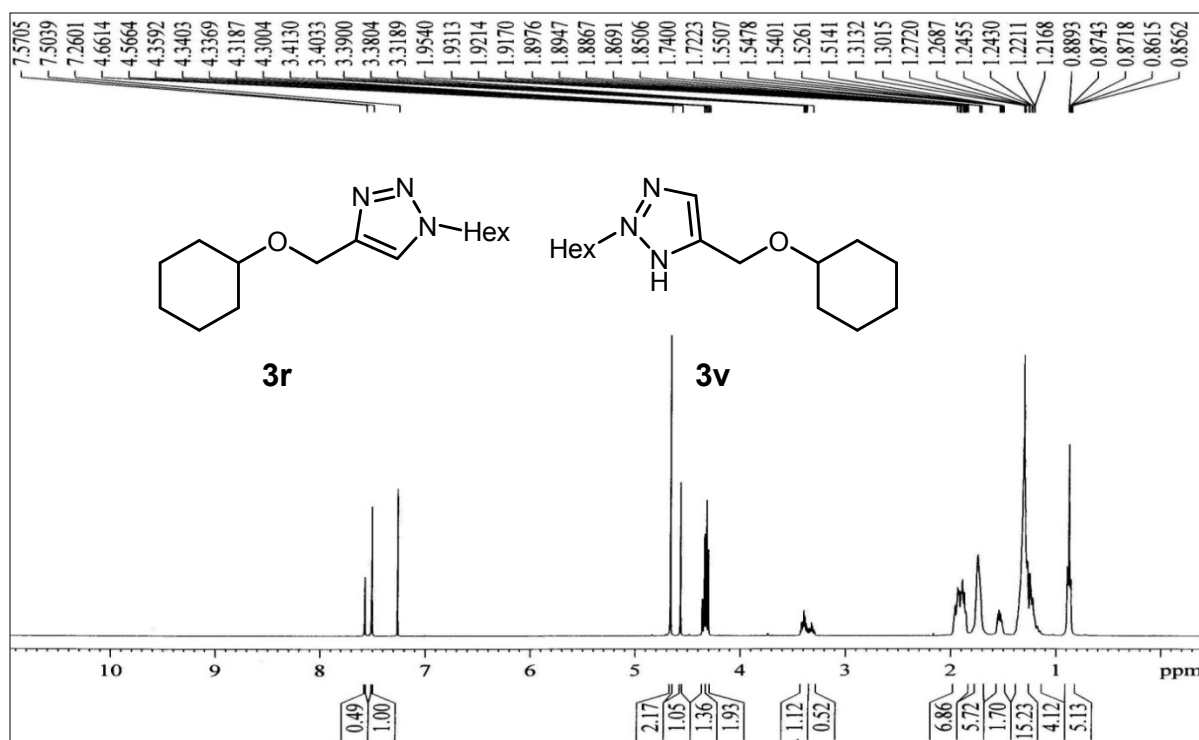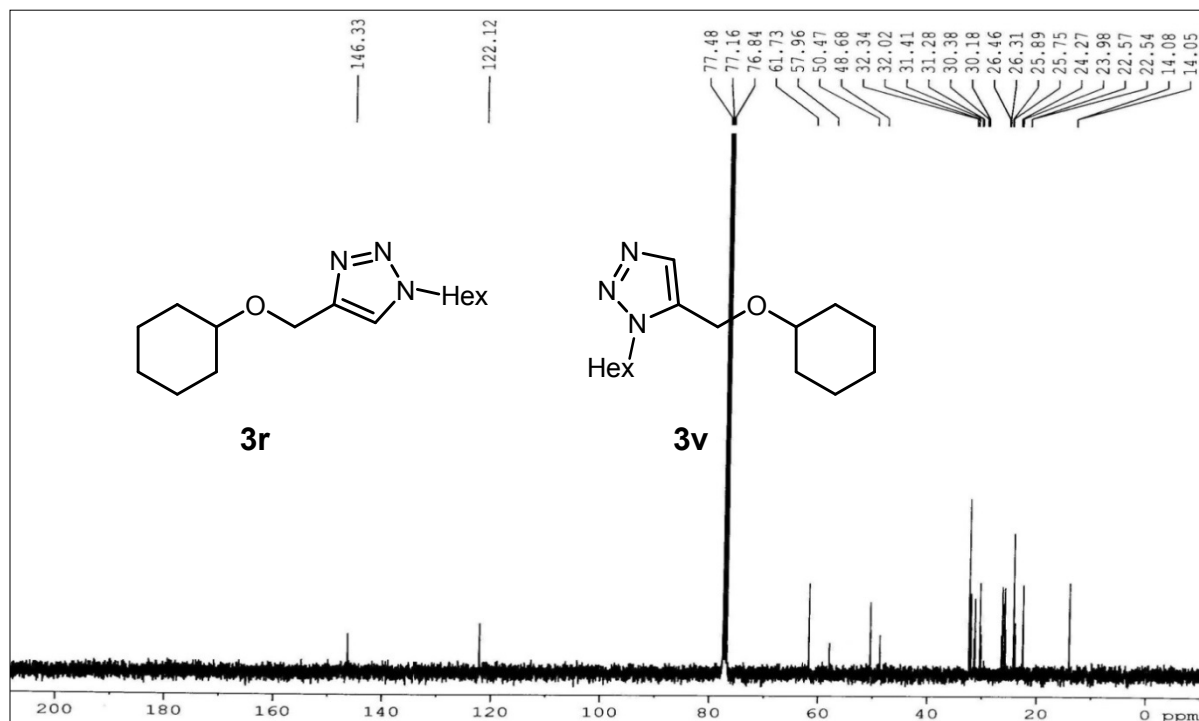

<sup>1</sup>H (400 MHz, CCl<sub>4</sub>:CDCl<sub>3</sub>, 1:1) and <sup>13</sup>C (100 MHz, CCl<sub>4</sub>:CDCl<sub>3</sub>, 1:1) NMR spectra of 4-(cyclohexyloxymethyl)-1-hexyl-1*H*-1,2,3-triazole, 5-(cyclohexyloxymethyl)-1-hexyl-1*H*-1,2,3-triazole **3r**, **3v**.

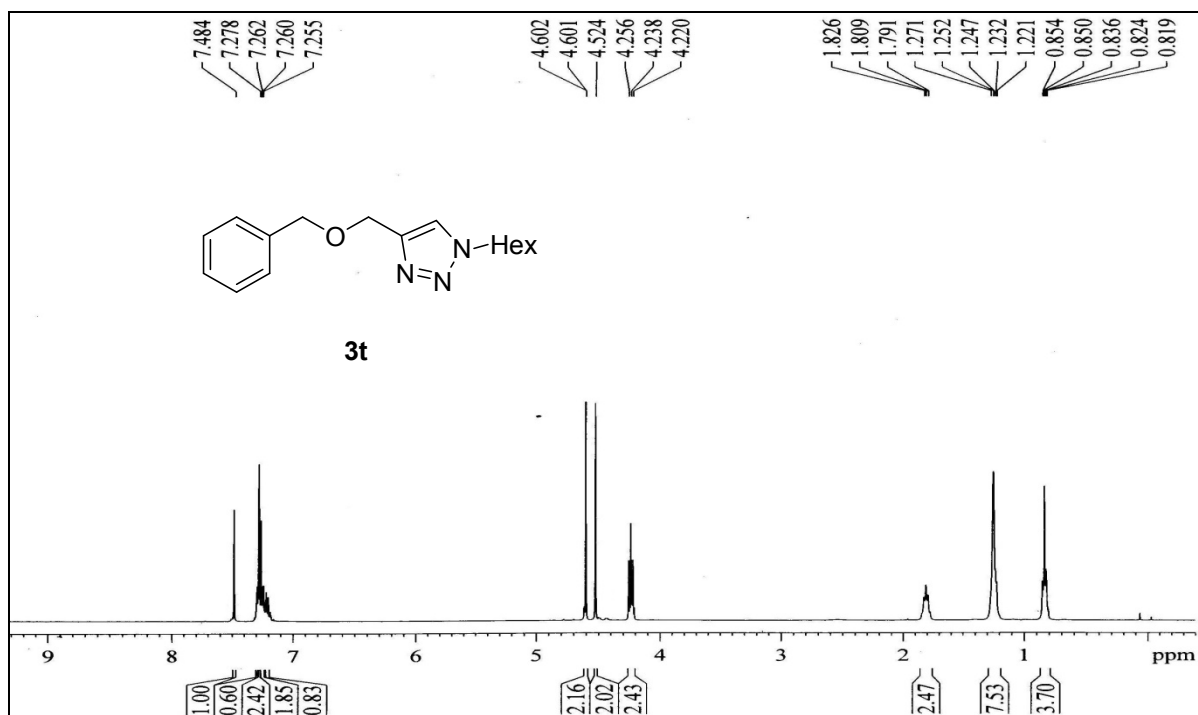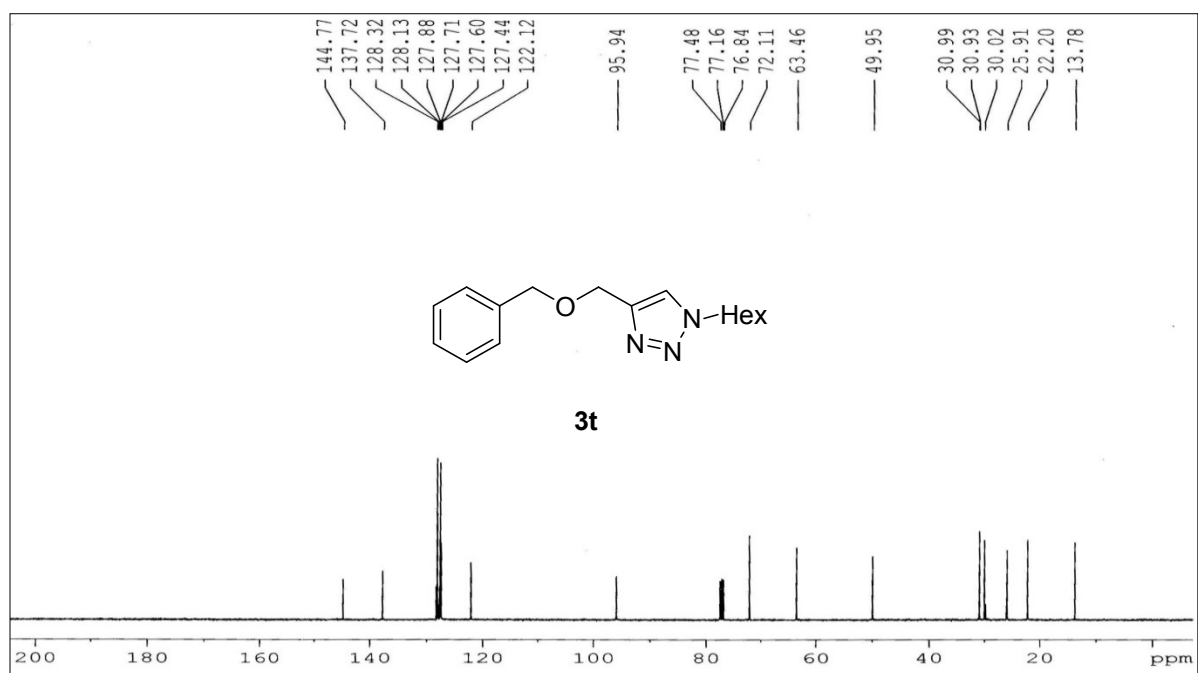

<sup>1</sup>H (400 MHz, CCl<sub>4</sub>:CDCl<sub>3</sub>, 1:1) and <sup>13</sup>C (100 MHz, CCl<sub>4</sub>:CDCl<sub>3</sub>, 1:1) NMR spectra of 4-(benzyloxymethyl)-1-hexyl-1H-1,2,3-triazole **3t**.

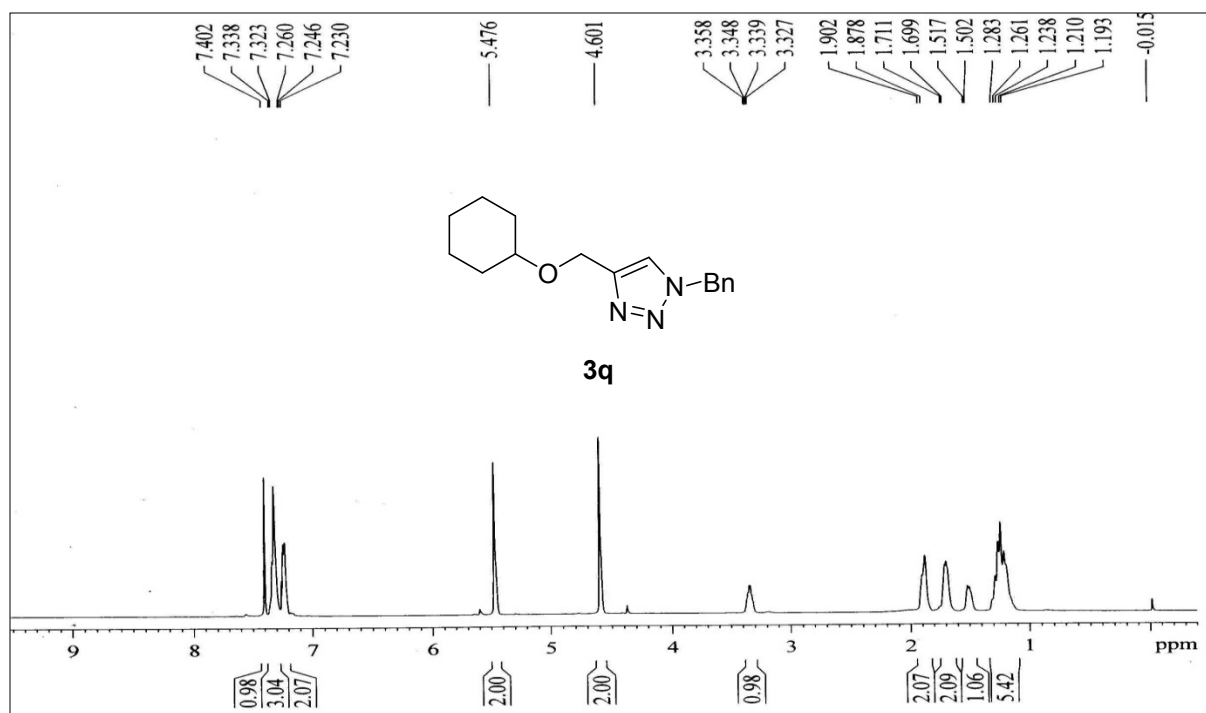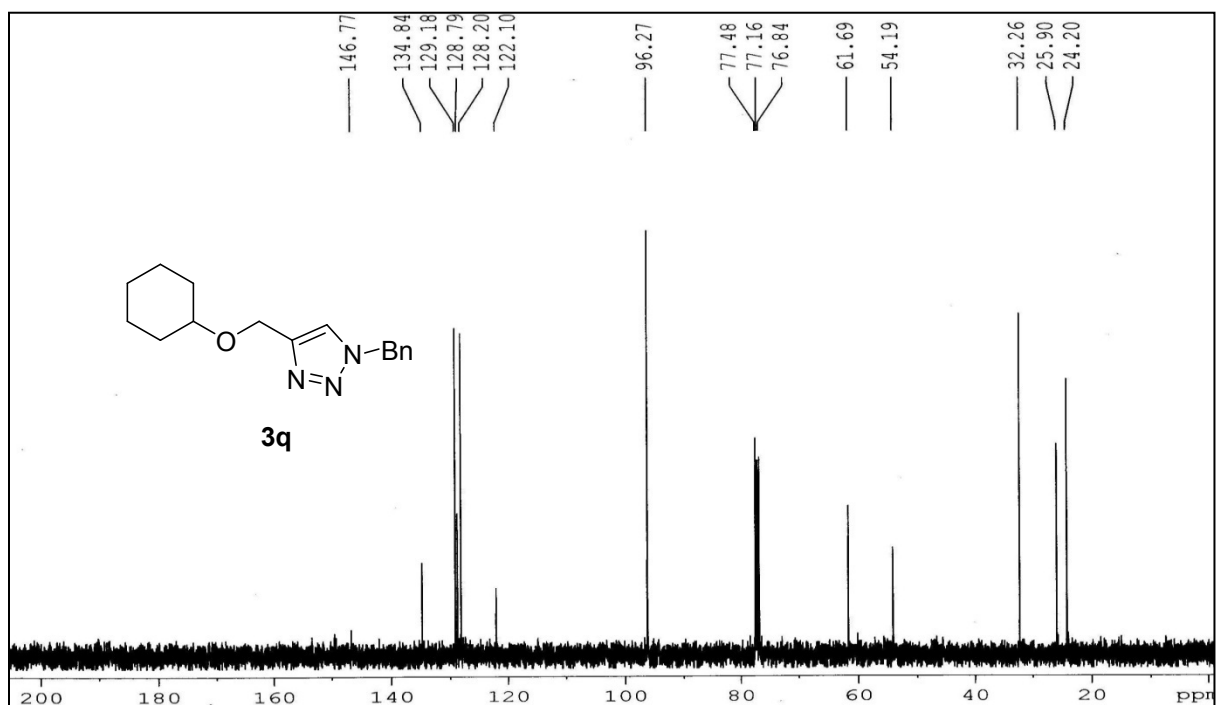

<sup>1</sup>H (400 MHz, CCl<sub>4</sub>:CDCl<sub>3</sub>, 1:1) and <sup>13</sup>C (100 MHz, CCl<sub>4</sub>:CDCl<sub>3</sub>, 1:1) NMR spectra of 1-benzyl-4-(cyclohexyloxymethyl)-1*H*-1,2,3-triazole **3u**.

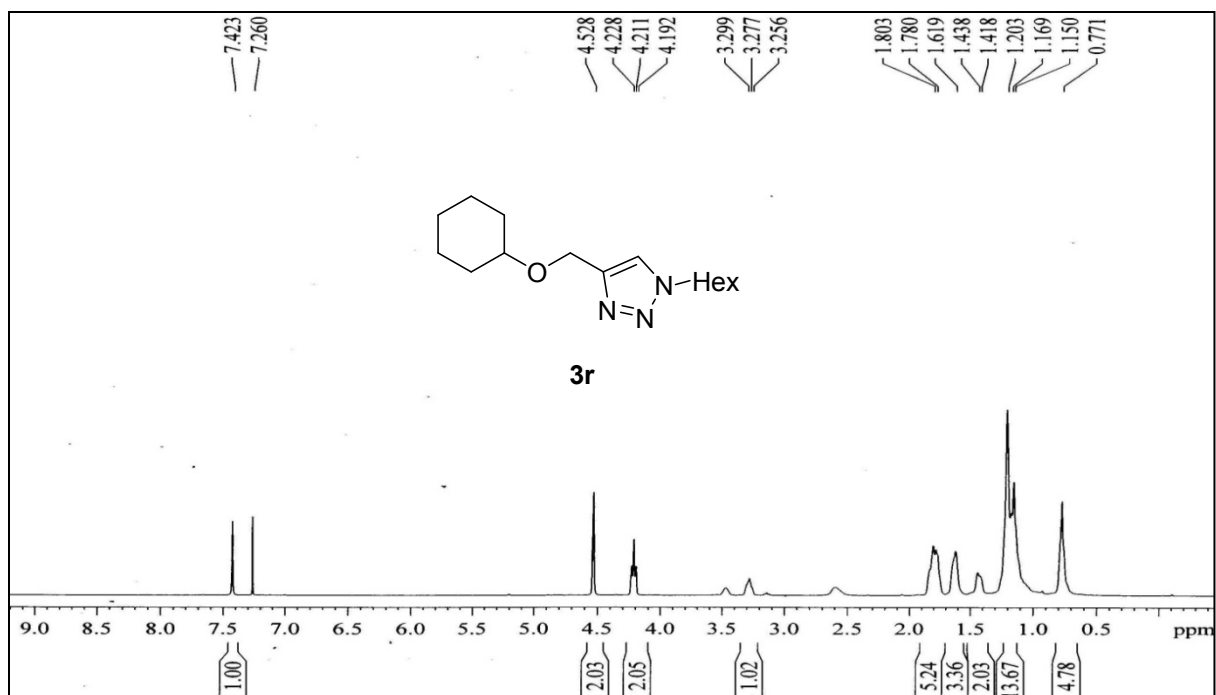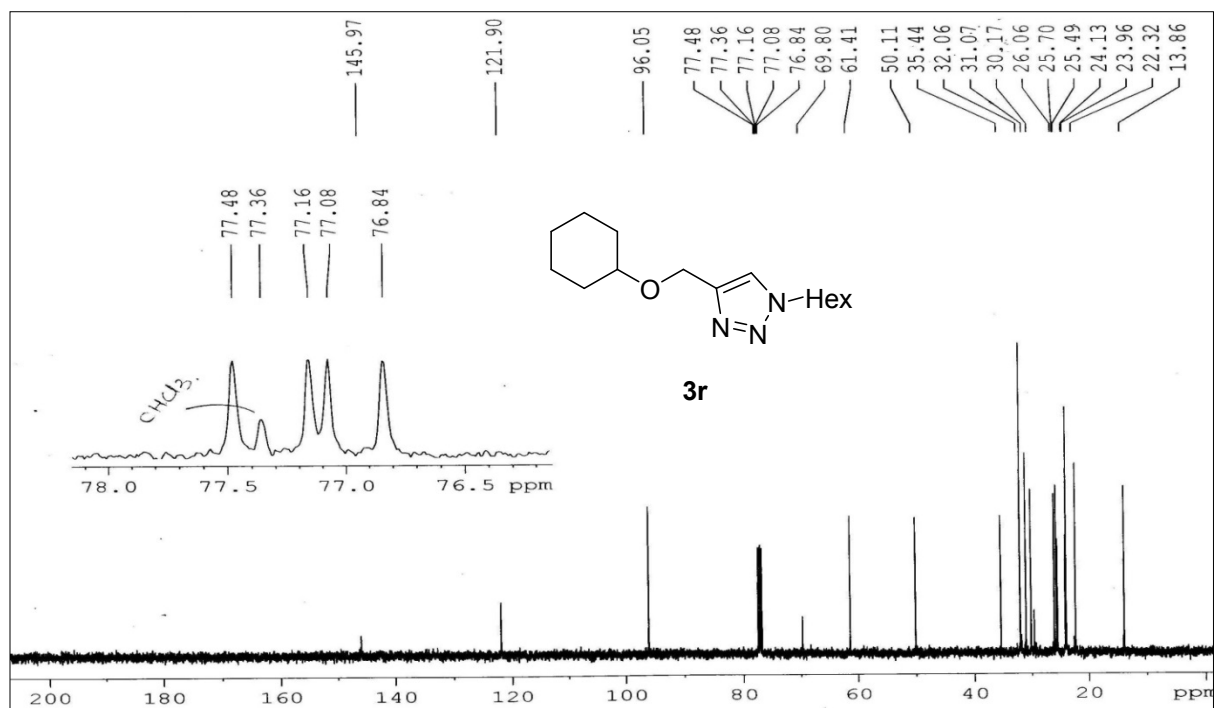

<sup>1</sup>H (400 MHz, CCl<sub>4</sub>:CDCl<sub>3</sub>, 1:1) and <sup>13</sup>C (100 MHz, CCl<sub>4</sub>:CDCl<sub>3</sub>, 1:1) NMR spectra of 4-(cyclohexyloxymethyl)-1-hexyl-1*H*-1,2,3-triazole **3v**.

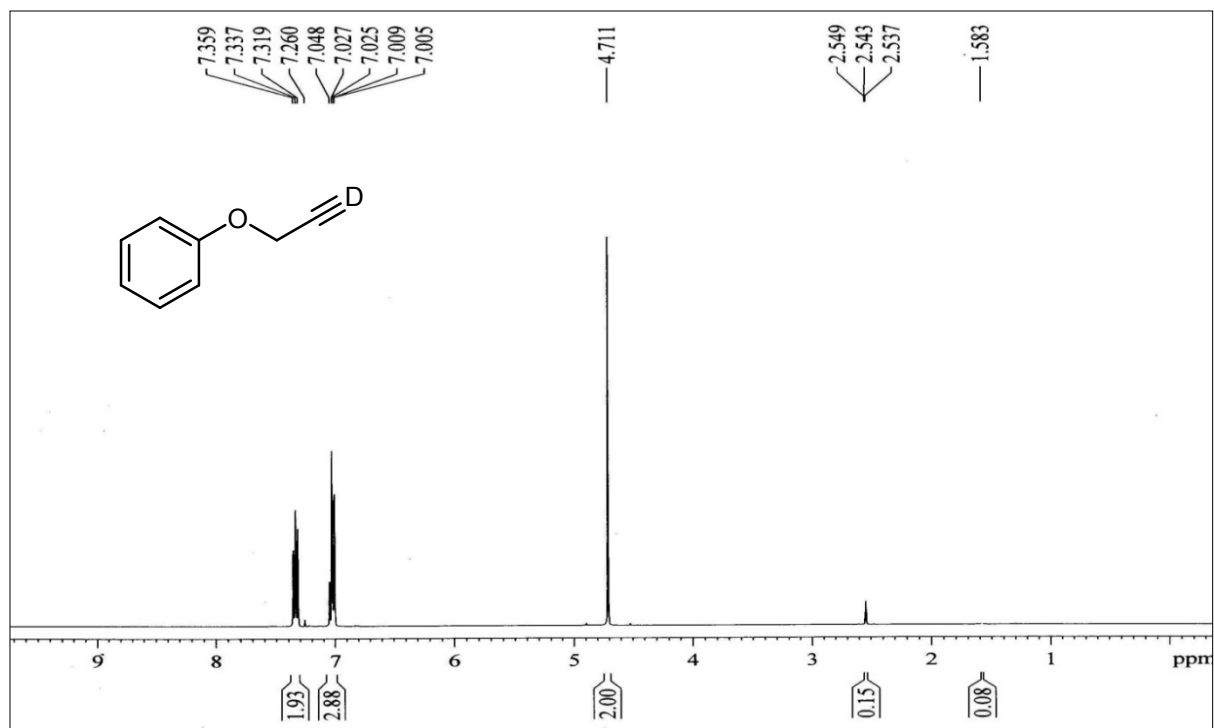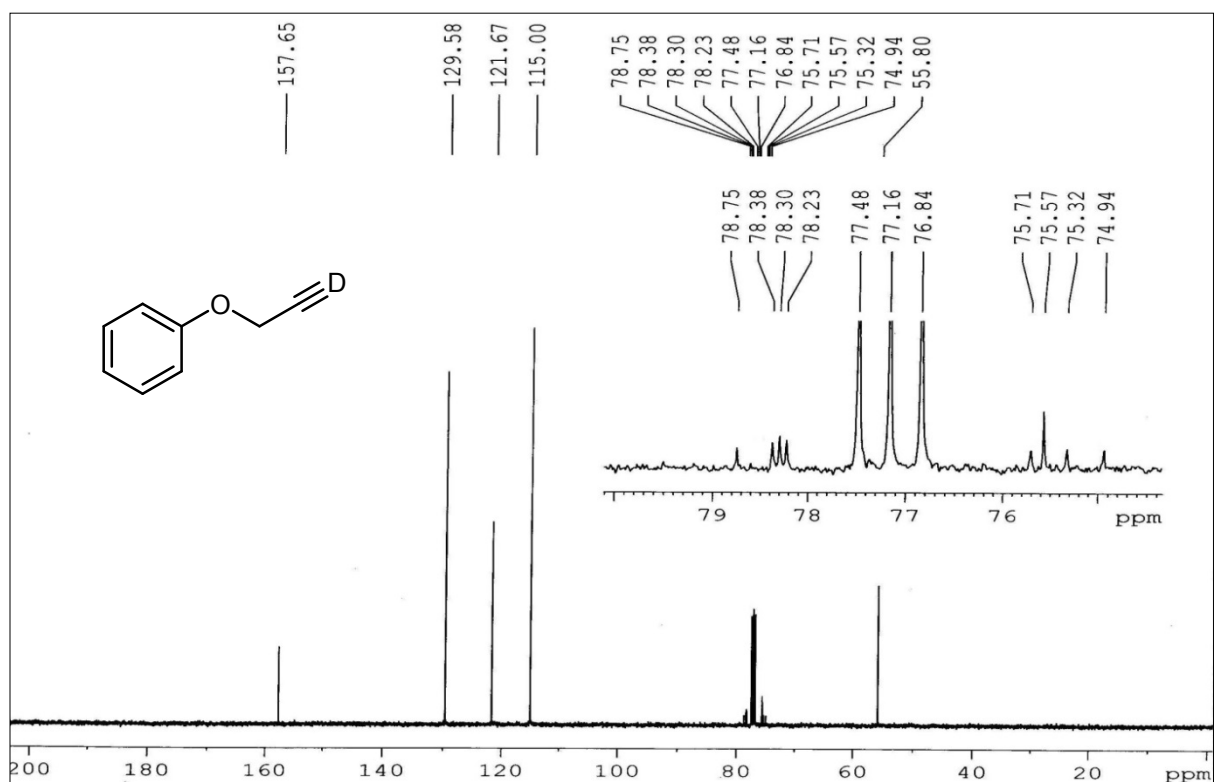

<sup>1</sup>H (400 MHz, CCl<sub>4</sub>:CDCl<sub>3</sub>, 1:1) and <sup>13</sup>C (100 MHz, CCl<sub>4</sub>:CDCl<sub>3</sub>, 1:1) NMR spectra of (((3-deuterioprop-2-yn-1-yl)oxy)methyl)benzene **4**.

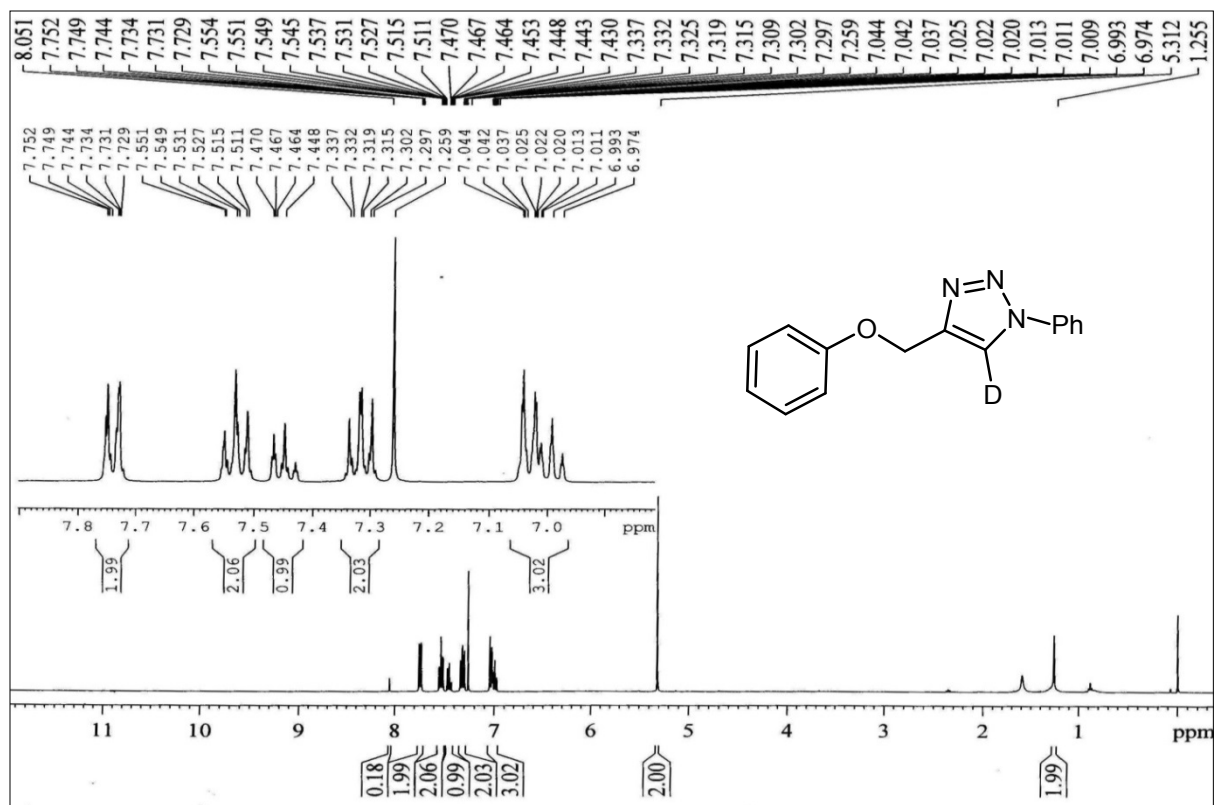

<sup>1</sup>H (400 MHz, CCl<sub>4</sub>:CDCl<sub>3</sub>, 1:1) and <sup>13</sup>C (100 MHz, CCl<sub>4</sub>:CDCl<sub>3</sub>, 1:1) NMR spectra of 4-(phenoxyethyl)-1-phenyl-1D-1,2,3-triazole **8**.



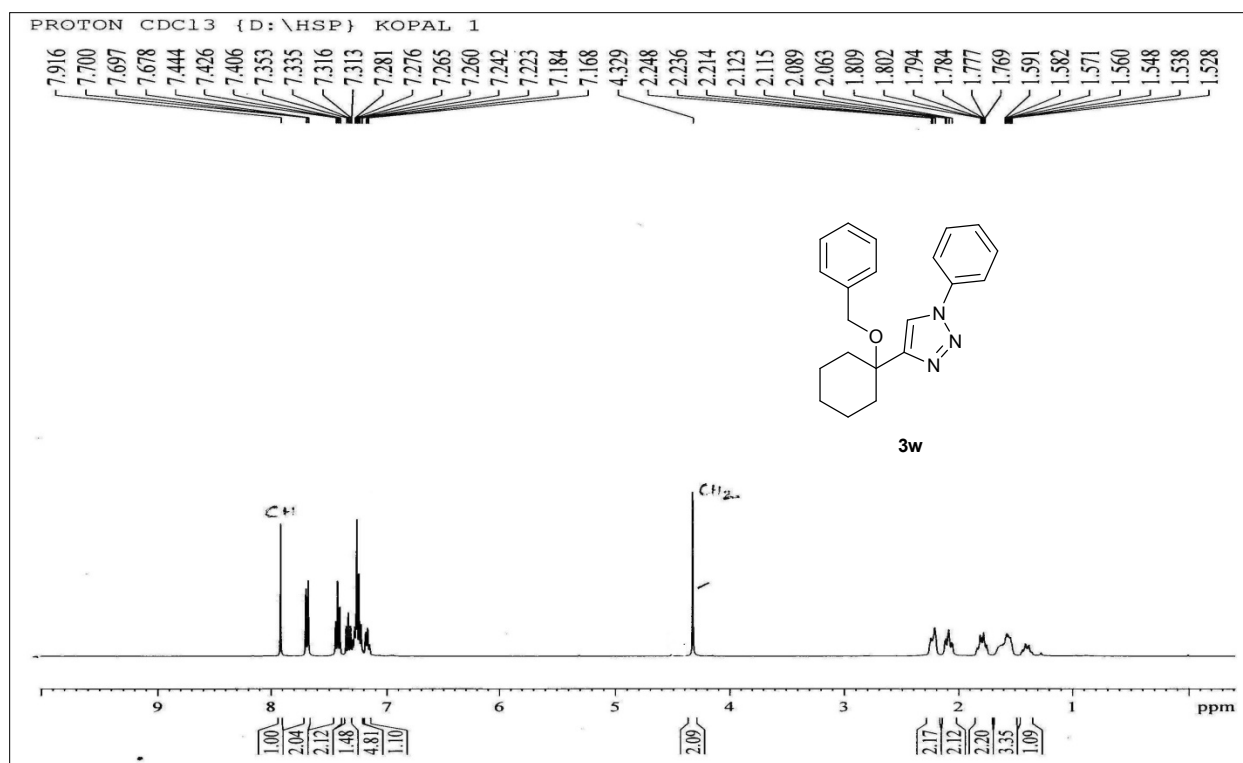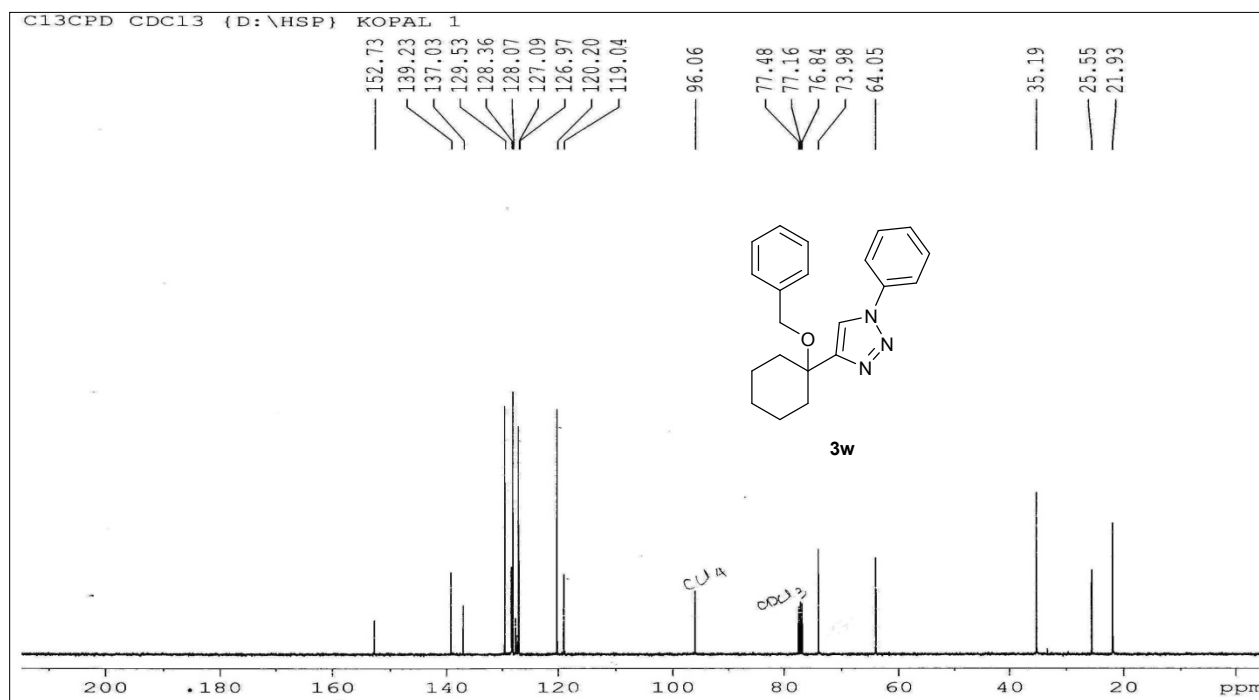

<sup>1</sup>H (400 MHz, CCl<sub>4</sub>:CDCl<sub>3</sub>, 1:1) and <sup>13</sup>C (100 MHz, CCl<sub>4</sub>:CDCl<sub>3</sub>, 1:1) NMR spectra of 4-(1-(benzyloxy)cyclohexyl)-1-phenyl-1H-1,2,3-triazole **3w**.

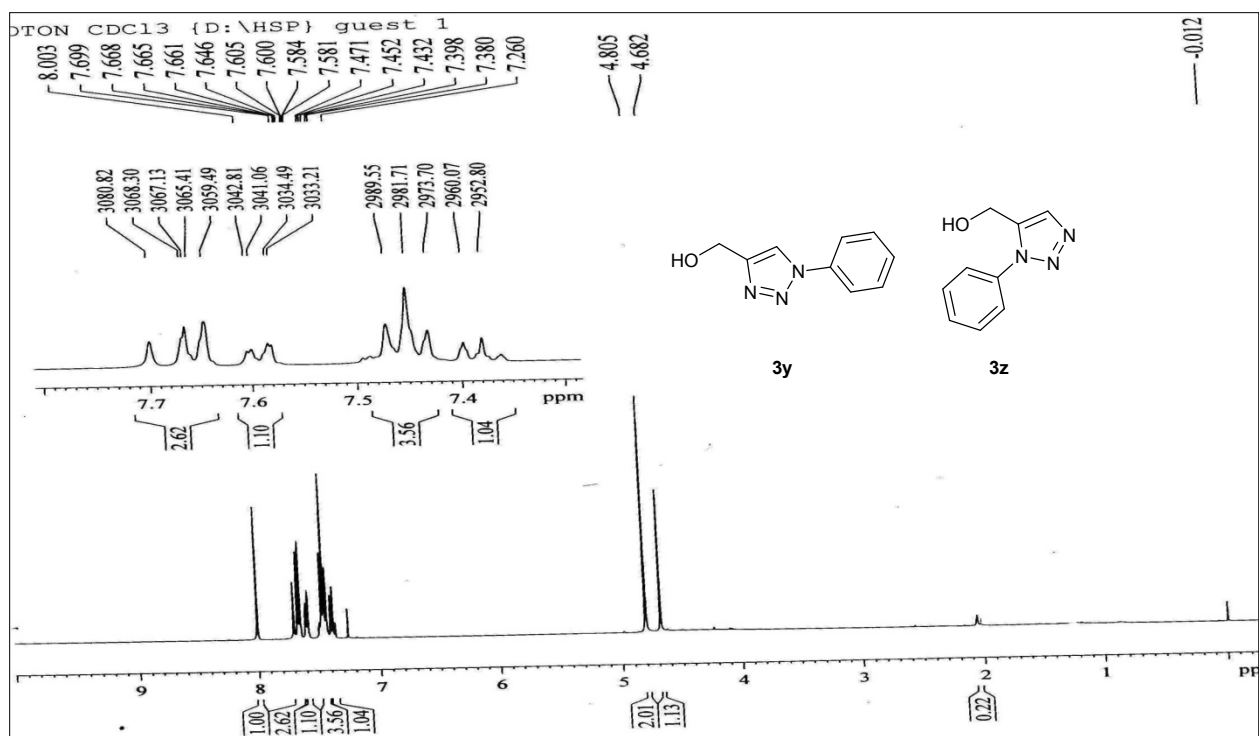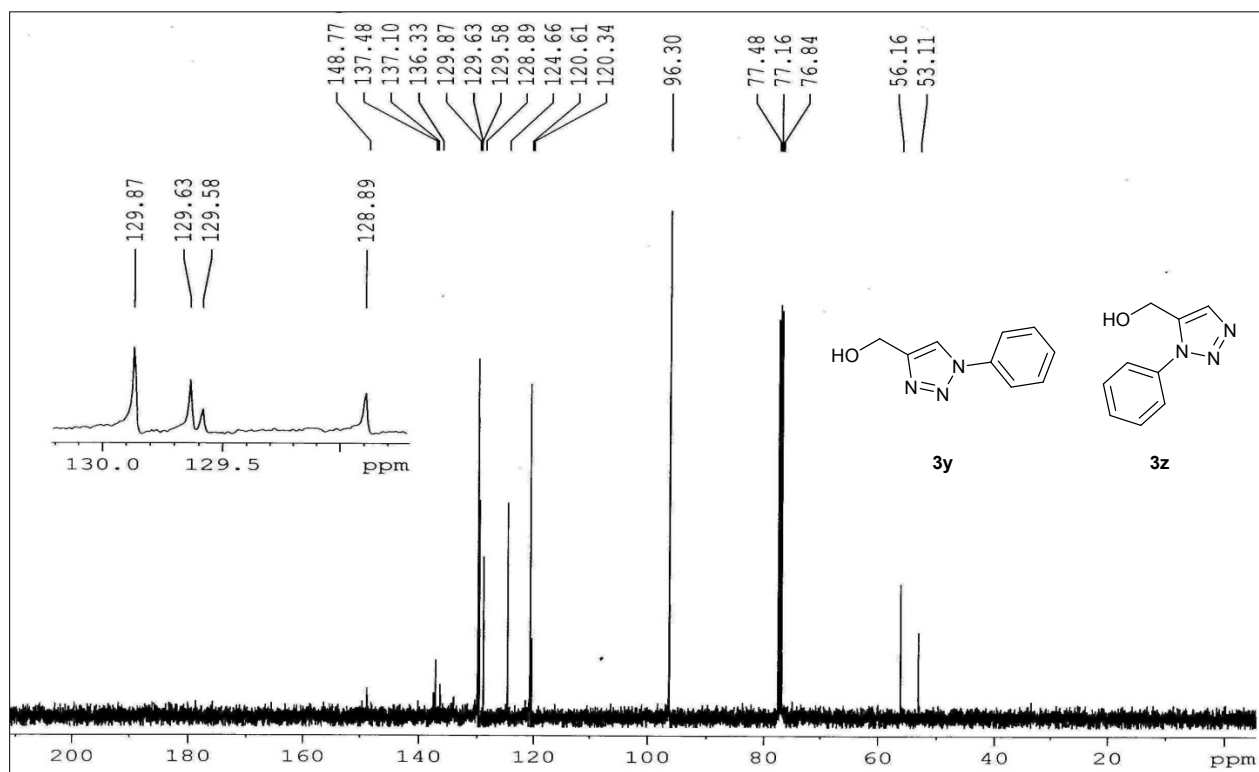

<sup>1</sup>H (400 MHz, CCl<sub>4</sub>:CDCl<sub>3</sub>, 1:1) and <sup>13</sup>C (100 MHz, CCl<sub>4</sub>:CDCl<sub>3</sub>, 1:1) NMR spectra of (1-phenyl-1H-1,2,3-triazol-4-yl)methanol **3y** and (1-phenyl-1H-1,2,3-triazol-5-yl)methanol **3z**.

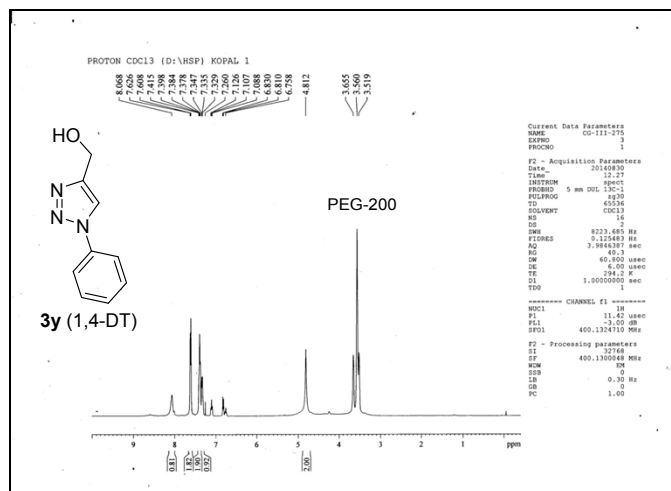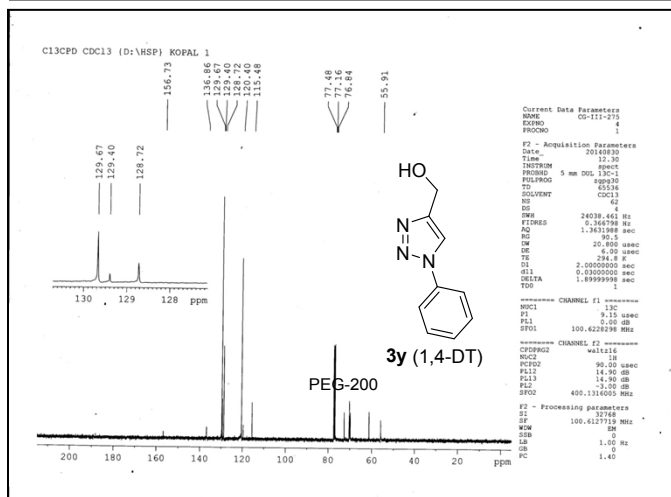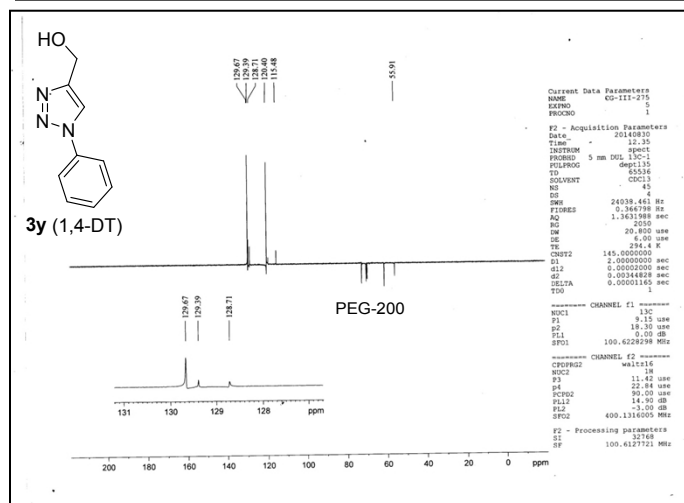

$^1\text{H}$  (400 MHz,  $\text{CDCl}_3$ )  $^{13}\text{C}$  (100 MHz,  $\text{CDCl}_3$ ) and DEPT-135 (100 MHz,  $\text{CDCl}_3$ ) NMR spectra of the crude cycloadduct from reaction of propargyl alcohol, phenyl azide and  $\text{CuSO}_4 \cdot 5\text{H}_2\text{O}$ , sodium ascorbate in PEG-200 under MW irradiation (with PEG impurity).
